# Supplementary material for: SARS-CoV-2 Spike Protein-Induced Interleukin 6 Signaling Is Blocked by a Plant-Produced Anti-Interleukin 6 Receptor Monoclonal Antibody
Source: MDPI journal article supplement (doi:10.3390/vaccines9111365), 2021-11-20
Supplement: s1 [file s1]

## Supplemental material

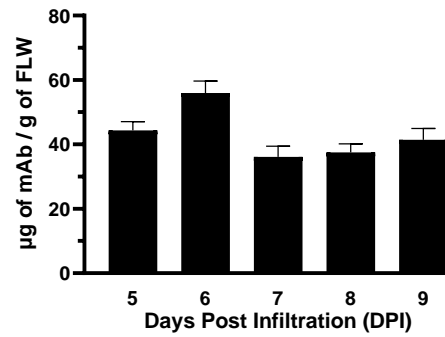

Figure S1. Temporal expression pattern of pIL6RmAb in *N. benthamiana* leaves. Total soluble proteins from pIL6RmAb construct-infiltrated plants were extracted on 5-9 days post infiltration (DPI) and analyzed by an ELISA that detects the assembled form of pIL6RmAb. Mean  $\pm$  SEM of samples from two independent experiments are presented.
